# Supplementary material for: Safety and Biocompatibility of Aflibercept-Loaded Microsphere Thermo-Responsive Hydrogel Drug Delivery System in a Nonhuman Primate Model
Source: PubMed Central journal article supplement — Transl Vis Sci Technol. 2020 Feb 27;9(3):30. doi: 10.1167/tvst.9.3.30 (PMC7354880; doi:10.1167/tvst.9.3.30), 2020-02-27
Supplement: tvst-9-3-30_s001.pdf [file tvst-9-3-30_s001.pdf]

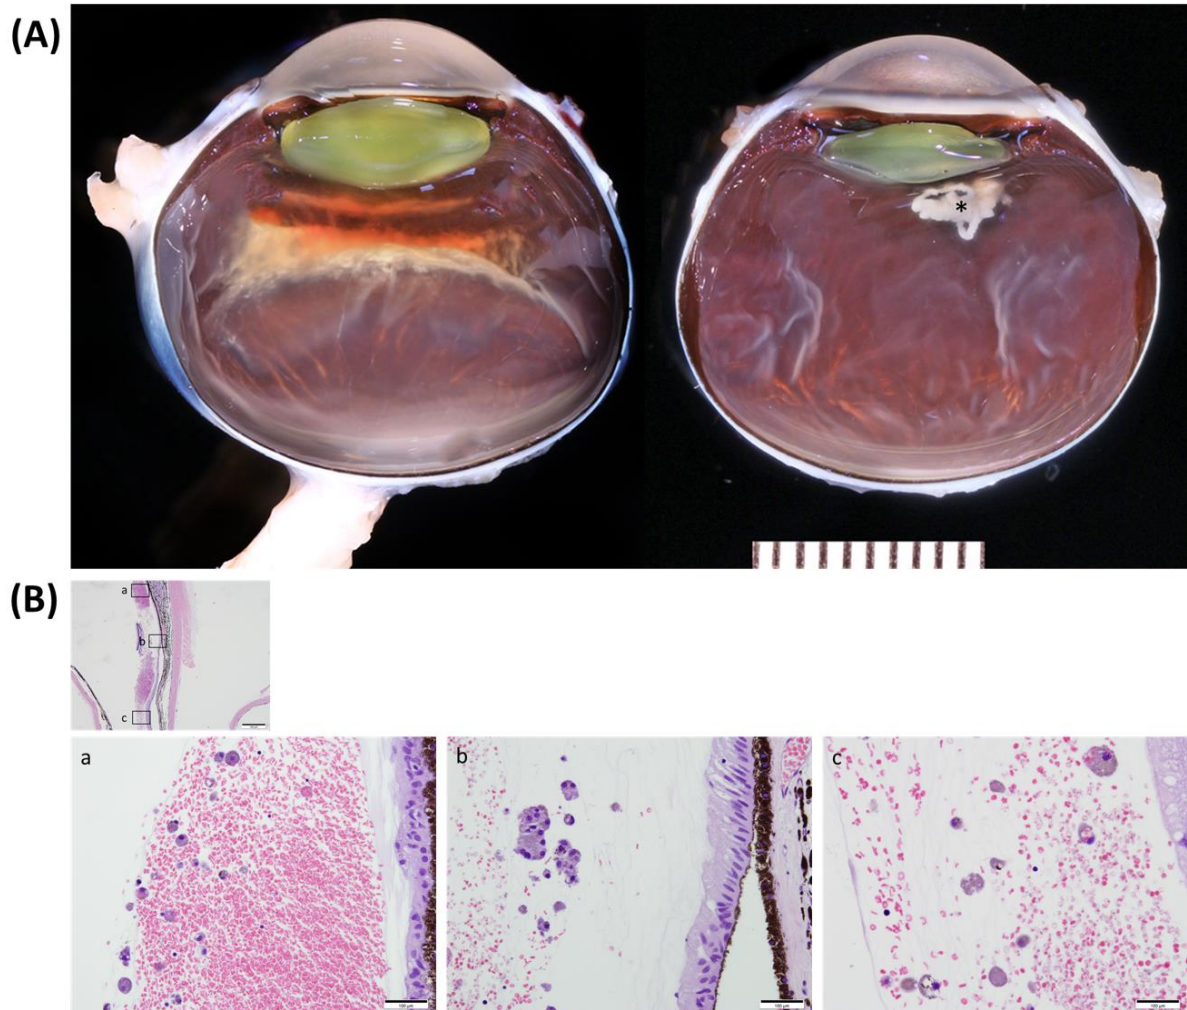

**Suppl 1. Histopathology of a nonhuman primate who sustained a retinal tear at the time of IVT injection of aflibercept-DDS; vitreous hemorrhage was visible at 1 month post-injection (#7). (A) Gross photo demonstrates DDS material (\*) in the superotemporal vitreous adjacent to pars planas. The DDS was opaque with well-defined borders and strings visible at 1 month post-IVT injection (A). (B) Dense accumulation of red blood cells was observed with clusters of macrophages in the anterior vitreous lining the pars plana and peripheral retina.**

**Suppl 2.** Signalment, IVT injection and examination findings, and endpoints for the 10 nonhuman primates included in this study.

| Animal # | Gender | Age (years) | Body weight (Kg) | DDS injection                                | Aqueous flare/cell (14-day post-inj.) | Aqueous flare/cell (at the end point) | Vitreous cell/floater (14-day post-inj.) | Vitreous cell/floater (at the end point) | Usage of the globes post euthanasia | End point (month post-inj.) |
|----------|--------|-------------|------------------|----------------------------------------------|---------------------------------------|---------------------------------------|------------------------------------------|------------------------------------------|-------------------------------------|-----------------------------|
| 1        | Male   | 8.5         | 13.41            | Clear inj. at 6 times attempts               | NA                                    | 0 / 0                                 | NA                                       | Tr / PB+TA                               | DDS concentration                   | 1                           |
| 2        | Male   | 4.5         | 8.26             | Clear inj. at once                           | NA                                    | 0 / 0                                 | NA                                       | 2 / PW+TA                                | DDS concentration                   | 2                           |
| 3        | Female | 4.5         | 6.8              | Clear inj. at 2 <sup>nd</sup> attempts       | NA                                    | 0 / 0                                 | NA                                       | 1 / PB+TA                                | DDS concentration                   | 3                           |
| 4        | Female | 5.2         | 6.25             | Clear inj. at once                           | NA                                    | 0 / 0                                 | NA                                       | 0 / TA                                   | Lost sample                         | 4                           |
| 5        | Female | 7.5         | 8.65             | Clear inj. at once                           | NA                                    | 0 / 0                                 | NA                                       | 0 / TA                                   | Lost sample                         | 5                           |
| 6        | Male   | 6.3         | 7.6              | Clear inj. at once                           | NA                                    | 0 / 0                                 | NA                                       | 0 / TA                                   | Lost sample                         | 6                           |
| 7        | Female | 11.7        | 9.75             | 5 times attempts: retinal hit and hemorrhage | Tr / 1                                | 0 / 0                                 | 4 / PB+TA                                | 2 / PW                                   | Histopathology                      | 1                           |
| 8        | Male   | 7.8         | 16.18            | Clear inj. at 3 <sup>rd</sup> attempts       | 0 / 2 (PW)                            | 0 / 0                                 | 2 / PB+TA                                | 0 / TA                                   | Histopathology                      | 6                           |
| 9        | Female | 11.5        | 7.15             | Clear inj. at once                           | 0 / 0                                 | 0 / 0                                 | 2 / M+TA                                 | 0 / TA                                   | DDS concentration                   | 6                           |
| 10       | Female | 7.6         | 7.88             | Clear inj. at once                           | 0 / 0                                 | 0 / 0                                 | 1 / PB+TA                                | 0 / TA                                   | DDS concentration                   | 5                           |

Aqueous flare and vitreous cell were evaluated by the SPOTS system at 16X magnification and slit beam setting at 12 mm beam height, 0.2 mm beam width, with ~30-45° beam angle. 0 = ≤ 1, Tr (trace) = 1-5, 1 = 6-25, 2 = 26-50, 3 = 51-100, and 4 = > 100 cells in field; PW, predominantly white; M, mixed color; PB, predominantly brown; NA, not applicable; inj., injection; TA, test article.

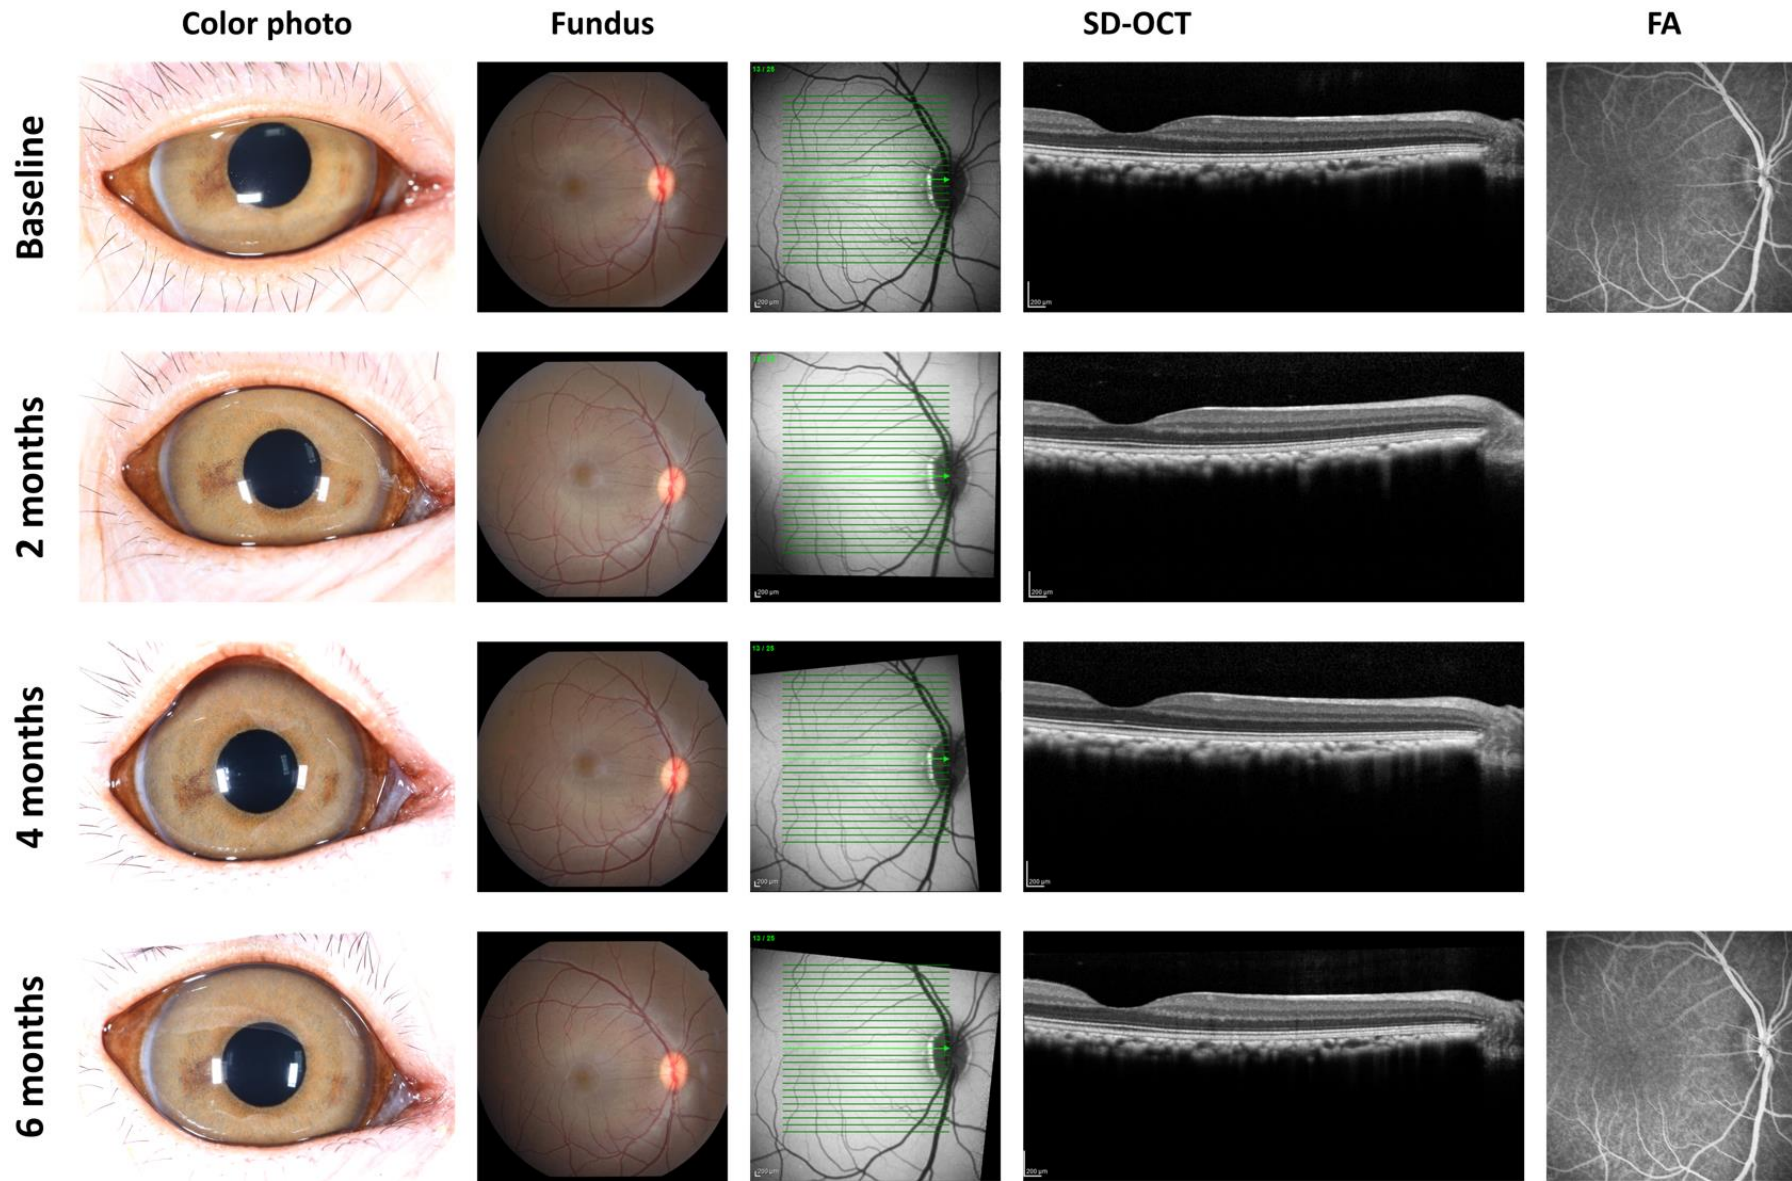

**Suppl 3. The funds and anterior structures appeared normal at all timepoint.** Representative images of a 7.6 year old female rhesus macaque (#10) prior to injection (baseline) as well as 2, 4 and 6 months post-injection showed no morphological abnormalities or changes with anterior segment photography, fundus photography, blue auto-fluorescence (AF) with SD-OCT and fluorescein angiography (FA).

**Suppl 4. Thickness of retinal layers measured by SD-OCT.**

| Retinal layers                                 | Thickness         | Group of eyes  | Baseline                                           | 1 month       | 2 month       | 3 month      | 4 month       | 5 month       | 6 month       |
|------------------------------------------------|-------------------|----------------|----------------------------------------------------|---------------|---------------|--------------|---------------|---------------|---------------|
|                                                | P-values          | ANOVA          | Tukey's multiple comparisons test (between groups) |               |               |              |               |               |               |
| Total retinal thickness (TRT)                  | thickness (µm)    | Treatment (OD) | 263.7 ± 6.8                                        | 269.7 ± 6.8   | 265.3 ± 6.8   | 272.0 ± 6.8  | 271.0 ± 6.8   | 268.7 ± 6.8   | 268.4 ± 7.0   |
|                                                |                   | Control (OS)   | 260.7 ± 6.8                                        | 266.3 ± 7.0   | 267.4 ± 6.8   | 265.3 ± 6.8  | 265.7 ± 6.8   | 269.7 ± 6.8   | 271.9 ± 7.0   |
|                                                | P (between group) | 0.65           | >0.99                                              | >0.99         | >0.99         | >0.99        | >0.99         | >0.99         | >0.99         |
|                                                | P (between time)  | 0.93           | OD / OS                                            | 0.97 / 0.98   | >0.99 / 0.96  | 0.89 / >0.99 | 0.94 / 0.99   | 0.99 / 0.86   | >0.99 / 0.72  |
| Nerve fiber layer (NFL)                        | thickness (µm)    | Treatment (OD) | 13.0 ± 1.3                                         | 12.3 ± 1.2    | 10.7 ± 1.3    | 13.0 ± 1.3   | 13.3 ± 1.3    | 11.3 ± 1.2    | 11.9 ± 1.4    |
|                                                |                   | Control (OS)   | 13.7 ± 1.3                                         | 14.0 ± 1.4    | 12.3 ± 1.3    | 10.7 ± 1.2   | 10.7 ± 1.3    | 13.3 ± 1.3    | 11.4 ± 1.4    |
|                                                | P (between group) | 0.92           | >0.99                                              | >0.99         | >0.99         | 0.99         | 0.97          | >0.99         | >0.99         |
|                                                | P (between time)  | 0.70           | OD / OS                                            | >0.99 / >0.99 | 0.64 / 0.95   | >0.99 / 0.40 | >0.99 / 0.40  | 0.87 / >0.99  | 0.96 / 0.66   |
| Ganglion cell/inner plexiform layers (GCL/IPL) | thickness (µm)    | Treatment (OD) | 32.0 ± 1.7                                         | 33.3 ± 1.8    | 33.7 ± 1.8    | 33.3 ± 1.7   | 33.0 ± 1.7    | 33.3 ± 1.8    | 34.3 ± 1.9    |
|                                                |                   | Control (OS)   | 34.7 ± 1.8                                         | 35.6 ± 2.0    | 32.7 ± 1.8    | 32.3 ± 1.8   | 33.0 ± 1.7    | 34.0 ± 1.8    | 36.3 ± 2.0    |
|                                                | P (between group) | 0.43           | >0.99                                              | >0.99         | >0.99         | >0.99        | >0.99         | >0.99         | >0.99         |
|                                                | P (between time)  | 0.83           | OD / OS                                            | 0.99 / >0.99  | 0.97 / 0.93   | 0.99 / 0.88  | >0.99 / 0.97  | 0.99 / >0.99  | 0.89 / 0.97   |
| Inner nuclear layer (INL)                      | thickness (µm)    | Treatment (OD) | 21.3 ± 1.2                                         | 18.0 ± 1.2    | 18.0 ± 1.2    | 18.0 ± 1.2   | 18.3 ± 1.2    | 19.0 ± 1.2    | 19.2 ± 1.4    |
|                                                |                   | Control (OS)   | 19.7 ± 1.2                                         | 17.1 ± 1.4    | 18.7 ± 1.2    | 16.7 ± 1.2   | 18.0 ± 1.2    | 18.3 ± 1.2    | 22.7 ± 1.4    |
|                                                | P (between group) | 0.88           | >0.99                                              | >0.99         | >0.99         | >0.99        | >0.99         | >0.99         | 0.78          |
|                                                | P (between time)  | 0.05           | OD / OS                                            | 0.28 / 0.53   | 0.28 / 0.98   | 0.28 / 0.38  | 0.38 / 0.86   | 0.62 / 0.94   | 0.71 / 0.36   |
| Outer plexiform layer (OPL)                    | thickness (µm)    | Treatment (OD) | 23.0 ± 1.6                                         | 20.0 ± 1.6    | 22.7 ± 1.6    | 22.0 ± 1.7   | 22.3 ± 1.6    | 21.3 ± 1.6    | 22.4 ± 1.8    |
|                                                |                   | Control (OS)   | 21.3 ± 1.6                                         | 24.3 ± 1.8    | 24.3 ± 1.6    | 25.7 ± 1.6   | 20.7 ± 1.7    | 22.7 ± 1.6    | 20.4 ± 1.7    |
|                                                | P (between group) | 0.38           | >0.99                                              | 0.85          | >0.99         | 0.95         | >0.99         | >0.99         | >0.99         |
|                                                | P (between time)  | 0.71           | OD / OS                                            | 0.64 / 0.65   | >0.99 / 0.64  | >0.99 / 0.30 | >0.99 / >0.99 | 0.95 / 0.98   | >0.99 / >0.99 |
| Outer nuclear layer (ONL)                      | thickness (µm)    | Treatment (OD) | 87.3 ± 2.7                                         | 92.7 ± 2.7    | 91.0 ± 2.0    | 90.0 ± 2.7   | 88.0 ± 2.6    | 91.0 ± 2.7    | 86.7 ± 2.9    |
|                                                |                   | Control (OS)   | 89.7 ± 2.7                                         | 91.2 ± 2.9    | 91.0 ± 2.7    | 83.7 ± 2.7   | 89.3 ± 2.7    | 89.0 ± 2.7    | 88.2 ± 2.9    |
|                                                | P (between group) | 0.61           | >0.99                                              | >0.99         | >0.99         | 0.92         | >0.99         | >0.99         | >0.99         |
|                                                | P (between time)  | 0.48           | OD / OS                                            | 0.57 / >0.99  | 0.85 / >0.99  | 0.96 / 0.46  | >0.99 / >0.99 | 0.75 / >0.99  | >0.99 / >0.99 |
| Retinal pigment epithelium (RPE)               | thickness (µm)    | Treatment (OD) | 19.3 ± 1.9                                         | 23.3 ± 1.9    | 19.0 ± 1.9    | 22.7 ± 1.9   | 24.0 ± 1.9    | 18.7 ± 1.9    | 22.8 ± 2.3    |
|                                                |                   | Control (OS)   | 16.7 ± 1.9                                         | 18.5 ± 2.3    | 21.0 ± 1.9    | 20.0 ± 1.9   | 23.7 ± 1.9    | 20.0 ± 1.9    | 23.7 ± 2.2    |
|                                                | P (between group) | 0.41           | >0.99                                              | 0.89          | >0.99         | >0.99        | >0.99         | >0.99         | >0.99         |
|                                                | P (between time)  | 0.07           | OD / OS                                            | 0.53 / 0.97   | >0.99 / 0.45  | 0.70 / 0.70  | 0.36 / 0.08   | >0.99 / 0.70  | 0.68 / 0.08   |
| Inner retinal layer (IRL)                      | thickness (µm)    | Treatment (OD) | 173.0 ± 6.2                                        | 174.7 ± 6.1   | 174.0 ± 6.2   | 171.3 ± 6.2  | 171.7 ± 6.1   | 174.0 ± 6.2   | 170.4 ± 6.3   |
|                                                |                   | Control (OS)   | 172.7 ± 6.2                                        | 179.8 ± 6.3   | 175.0 ± 6.2   | 165.7 ± 6.2  | 167.0 ± 6.2   | 174.3 ± 6.1   | 172.9 ± 6.3   |
|                                                | P (between group) | 0.94           | >0.99                                              | >0.99         | >0.99         | >0.99        | >0.99         | >0.99         | >0.99         |
|                                                | P (between time)  | 0.81           | OD / OS                                            | >0.99 / 0.91  | >0.99 / >0.99 | >0.99 / 0.92 | >0.99 / 0.97  | >0.99 / >0.99 | >0.99 / >0.99 |
| Outer retinal layer (ORL)                      | thickness (µm)    | Treatment (OD) | 90.3 ± 2.2                                         | 95.0 ± 2.3    | 91.3 ± 2.2    | 100.7 ± 2.2  | 99.3 ± 2.1    | 95.0 ± 2.2    | 98.0 ± 2.7    |
|                                                |                   | Control (OS)   | 88.0 ± 2.2                                         | 87.5 ± 2.7    | 92.0 ± 2.2    | 99.3 ± 2.2   | 99.3 ± 2.1    | 95.0 ± 2.2    | 99.5 ± 2.8    |
|                                                | P (between group) | 0.31           | >0.99                                              | 0.59          | >0.99         | >0.99        | >0.99         | >0.99         | >0.99         |
|                                                | P (between time)  | 0.06           | OD / OS                                            | 0.50 / 0.99   | >0.99 / 0.82  | 0.05 / 0.08  | 0.09 / 0.05   | 0.50 / 0.31   | 0.16 / 0.05   |

**Suppl 5.** Rod and cone a- and b-wave amplitudes and implicit times as measured by full-field electroretinography.

| ERG measurements               |                   | Amplitudes                  | Group of eyes  | Baseline                          | 1 month          | 2 month          | 3 month          | 4 month          | 5 month          | 6 month          |       |
|--------------------------------|-------------------|-----------------------------|----------------|-----------------------------------|------------------|------------------|------------------|------------------|------------------|------------------|-------|
|                                |                   | P-values                    | ANOVA          | Tukey's multiple comparisons test |                  |                  |                  |                  |                  |                  |       |
| Scotopic<br>(Dark adaptation)  | a-wave            | amplitude ( $\mu\text{V}$ ) | Treatment (OD) | 162.0 $\pm$ 24.8                  | 136.3 $\pm$ 29.7 | 148.2 $\pm$ 24.8 | 134.9 $\pm$ 24.8 | 118.7 $\pm$ 24.8 | 160.7 $\pm$ 24.8 | 136.7 $\pm$ 29.8 |       |
|                                |                   |                             | Control (OS)   | 118.3 $\pm$ 24.8                  | 103.9 $\pm$ 24.8 | 118.0 $\pm$ 24.8 | 116.8 $\pm$ 24.8 | 149.3 $\pm$ 24.8 | 143.3 $\pm$ 24.8 | 153.7 $\pm$ 29.8 |       |
|                                |                   | P (between group)           | 0.34           | >0.99                             | >0.99            | >0.99            | >0.99            | >0.99            | >0.99            | >0.99            | >0.99 |
|                                |                   | P (between time)            | 0.90           | OD / OS                           | 0.98 / >0.99     | >0.99 / >0.99    | 0.98 / >0.99     | 0.82 / 0.96      | >0.99 / 0.96     | 0.98 / 0.92      |       |
|                                |                   | implicit time (ms)          | Treatment (OD) | 13.8 $\pm$ 0.7                    | 14.7 $\pm$ 1.3   | 13.8 $\pm$ 0.9   | 11.9 $\pm$ 0.8   | 12.7 $\pm$ 1.9   | 12.9 $\pm$ 1.1   | 12.7 $\pm$ 1.3   |       |
|                                |                   |                             | Control (OS)   | 13.8 $\pm$ 1.2                    | 14.7 $\pm$ 2.2   | 12.0 $\pm$ 1.3   | 12.9 $\pm$ 2.1   | 11.6 $\pm$ 1.4   | 12.9 $\pm$ 0.9   | 12.7 $\pm$ 1.4   |       |
|                                | P (between group) | 0.72                        | >0.99          | >0.99                             | 0.96             | >0.99            | >0.99            | >0.99            | >0.99            | >0.99            |       |
|                                | P (between time)  | 0.58                        | OD / OS        | >0.99 / >0.99                     | >0.99 / 0.87     | 0.84 / >0.99     | 0.98 / 0.75      | >0.99 / >0.99    | 0.98 / 0.98      |                  |       |
|                                | b-wave            | amplitude ( $\mu\text{V}$ ) | Treatment (OD) | 295.0 $\pm$ 50.5                  | 238.5 $\pm$ 55.9 | 278/4 $\pm$ 56.0 | 242.7 $\pm$ 50.5 | 241.7 $\pm$ 50.5 | 253.7 $\pm$ 50.5 | 217.4 $\pm$ 56.0 |       |
|                                |                   |                             | Control (OS)   | 254.7 $\pm$ 50.5                  | 222.3 $\pm$ 50.5 | 231.7 $\pm$ 50.5 | 229.0 $\pm$ 50.5 | 237.3 $\pm$ 50.5 | 218.3 $\pm$ 50.5 | 220.9 $\pm$ 56.0 |       |
|                                |                   | P (between group)           | 0.44           | >0.99                             | >0.99            | >0.99            | >0.99            | >0.99            | >0.99            | >0.99            |       |
|                                |                   | P (between time)            | 0.96           | OD / OS                           | 0.97 / >0.99     | >0.99 / >0.99    | 0.96 / >0.99     | 0.98 / >0.99     | >0.99 / >0.99    | 0.88 / >0.99     |       |
| implicit time (ms)             |                   | Treatment (OD)              | 44.6 $\pm$ 2.5 | 41.4 $\pm$ 0.4                    | 36.9 $\pm$ 3.7   | 44.4 $\pm$ 8.3   | 41.3 $\pm$ 1.1   | 41.5 $\pm$ 3.8   | 42.1 $\pm$ 4.5   |                  |       |
|                                |                   | Control (OS)                | 45.6 $\pm$ 2.6 | 43.6 $\pm$ 1.4                    | 39.2 $\pm$ 1.6   | 40.9 $\pm$ 3.5   | 40.2 $\pm$ 4.6   | 43.7 $\pm$ 7.5   | 40.9 $\pm$ 5.9   |                  |       |
| P (between group)              | 0.91              | >0.99                       | >0.99          | >0.99                             | >0.99            | >0.99            | >0.99            | >0.99            | >0.99            |                  |       |
| P (between time)               | 0.80              | OD / OS                     | 0.99 / >0.99   | 0.65 / 0.79                       | >0.99 / 0.93     | 0.99 / 0.88      | >0.99 / >0.99    | >0.99 / 0.93     |                  |                  |       |
| Photopic<br>(Light adaptation) | a-wave            | amplitude ( $\mu\text{V}$ ) | Treatment (OD) | 18.0 $\pm$ 5.3                    | 19.9 $\pm$ 5.3   | 11.2 $\pm$ 6.2   | 13.5 $\pm$ 5.3   | 13.3 $\pm$ 5.3   | 17.5 $\pm$ 5.3   | 22.4 $\pm$ 6.2   |       |
|                                |                   |                             | Control (OS)   | 21.3 $\pm$ 5.3                    | 20.7 $\pm$ 5.3   | 18.8 $\pm$ 6.2   | 17.7 $\pm$ 5.3   | 7.8 $\pm$ 5.3    | 21.7 $\pm$ 5.3   | 23.5 $\pm$ 6.2   |       |
|                                |                   | P (between group)           | 0.45           | >0.99                             | >0.99            | >0.99            | >0.99            | >0.99            | >0.99            | >0.99            |       |
|                                |                   | P (between time)            | 0.38           | OD / OS                           | >0.99 / >0.99    | 0.89 / >0.99     | 0.98 / >0.99     | 0.98 / 0.36      | >0.99 / >0.99    | 0.98 / >0.99     |       |
|                                |                   | implicit time (ms)          | Treatment (OD) | 12.1 $\pm$ 2.1                    | 12.6 $\pm$ 1.1   | 12.1 $\pm$ 1.6   | 12.9 $\pm$ 1.5   | 12.8 $\pm$ 0.2   | 12.9 $\pm$ 1.6   | 13.4 $\pm$ 0.5   |       |
|                                |                   |                             | Control (OS)   | 13.6 $\pm$ 1.1                    | 15.0 $\pm$ 3.8   | 13.3 $\pm$ 0.3   | 13.2 $\pm$ 1.3   | 10.9 $\pm$ 1.3   | 13.1 $\pm$ 0.7   | 13.4 $\pm$ 0.3   |       |
|                                | P (between group) | 0.52                        | >0.99          | 0.89                              | >0.99            | >0.99            | 0.97             | >0.99            | >0.99            | >0.99            |       |
|                                | P (between time)  | 0.92                        | OD / OS        | >0.99 / 0.97                      | >0.99 / >0.99    | >0.99 / >0.99    | >0.99 / 0.64     | >0.99 / >0.99    | 0.98 / >0.99     |                  |       |
|                                | b-wave            | amplitude ( $\mu\text{V}$ ) | Treatment (OD) | 74.1 $\pm$ 17.3                   | 68.4 $\pm$ 17.3  | 80.0 $\pm$ 18.1  | 61.0 $\pm$ 17.3  | 69.4 $\pm$ 17.3  | 95.1 $\pm$ 17.3  | 72.6 $\pm$ 18.1  |       |
|                                |                   |                             | Control (OS)   | 97.5 $\pm$ 17.3                   | 65.6 $\pm$ 17.3  | 79.8 $\pm$ 18.1  | 66.9 $\pm$ 17.3  | 81.7 $\pm$ 17.3  | 86.9 $\pm$ 17.3  | 78.7 $\pm$ 18.1  |       |
|                                |                   | P (between group)           | 0.58           | >0.99                             | >0.99            | >0.99            | >0.99            | >0.99            | >0.99            | >0.99            |       |
|                                |                   | P (between time)            | 0.73           | OD / OS                           | >0.99 / 0.62     | >0.99 / 0.95     | 0.99 / 0.67      | >0.99 / 0.97     | 0.90 / >0.99     | >0.99 / 0.94     |       |
| implicit time (ms)             |                   | Treatment (OD)              | 30.1 $\pm$ 1.9 | 27.6 $\pm$ 1.2                    | 28.0 $\pm$ 0.4   | 28.4 $\pm$ 2.8   | 28.0 $\pm$ 3.1   | 28.0 $\pm$ 1.9   | 27.0 $\pm$ 1.8   |                  |       |
|                                |                   | Control (OS)                | 29.9 $\pm$ 0.9 | 27.7 $\pm$ 1.6                    | 27.9 $\pm$ 0.4   | 28.6 $\pm$ 2.7   | 28.9 $\pm$ 4.0   | 28.9 $\pm$ 1.6   | 27.6 $\pm$ 0.8   |                  |       |
| P (between group)              | 0.76              | >0.99                       | >0.99          | >0.99                             | >0.99            | >0.99            | >0.99            | >0.99            | >0.99            |                  |       |
| P (between time)               | 0.90              | OD / OS                     | 0.90 / 0.94    | 0.95 / 0.96                       | 0.98 / >0.99     | 0.95 / >0.99     | 0.95 / >0.99     | 0.78 / 0.92      |                  |                  |       |
